# Supplementary material for: Outcomes of feeding activity of the sea cucumber Holothuria tubulosa on quantity, biochemical composition, and nutritional quality of sedimentary organic matter
Source: Frontiers journal article supplement (doi:10.3389/fmars.2022.1010014), 2023-01-26
Supplement: Data_Sheet_1.docx [file Data_Sheet_1.docx]

Supplementary Material

# Supplementary Figures and Tables

**Supplementary Table 1:** Results of univariate PERMANOVA testing for the effects of Site (Si), Month Mo) and their interactions on protein, carbohydrate, lipid, BPC, chlorophyll *a* and phaeopigments contents in the ambient sediment. DF = degree of freedom; MS = mean squares; Pseudo-F = F; P(MC) = probability level after Monte Carlo simulations; EV = % of explained variance. * = P < 0.05; ** = P < 0.01; *** = P < 0.001; ns = not significant.

|  |  | **Proteins** | | | | **Carbohydrates** | | | | | | |
| --- | --- | --- | --- | --- | --- | --- | --- | --- | --- | --- | --- | --- |
| **Source** | **DF** | **MS** | **Pseudo-F** | **P(MC)** | **% EV** | **MS** | **Pseudo-F** | | **P(MC)** | | **% EV** | |
| **Site (Si)** | 1 | 23.275 | 38.016 | *** | 34.983 | 1.890 | 2.059 | | ns | | 2 | |
| **Month (Mo)** | 5 | 2.725 | 4.4515 | ** | 9.514 | 1.527 | 1.663 | | ns | | 3 | |
| **Si×Mo** | 5 | 1.643 | 2.683 | * | 9.281 | 1.508 | 1.643 | | ns | | 7 | |
| **Residual** | 91 | 0.612 |  |  | 46.220 | 0.918 |  | |  | | 88 | |
|  |  |  |  |  |  |  |  | |  | |  | |
|  |  | **Lipids** | | | | **BPC** | | | | | | |
| **Source** | **DF** | **MS** | **Pseudo-F** | **P(MC)** | **% EV** | **MS** | **Pseudo-F** | | **P(MC)** | | **% EV** | |
| **Site (Si)** | 1 | 20.219 | 51.245 | *** | 30.661 | 8.536 | 10.148 | | ** | | 14 | |
| **Month (Mo)** | 5 | 2.425 | 6.148 | *** | 9.164 | 1.529 | 1.8184 | | ns | | 4 | |
| **Si×Mo** | 5 | 3.756 | 9.520 | *** | 30.330 | 1.699 | 2.020 | | ns | | 9 | |
| **Residual** | 91 | 0.394 |  |  | 29.844 | 0.841 |  | |  | | 74 | |
|  |  |  |  |  |  |  |  | |  | |  | |
|  |  | **Chlorophyll-*a*** | | | | **Phaeopigments** | | | | | | |
| **Source** | **DF** | **MS** | **Pseudo-F** | **P(MC)** | **% EV** | **MS** | | **Pseudo-F** | | **P(MC)** | | **% EV** |
| **Site (Si)** | 1 | 54.571 | 179.600 | *** | 66.353 | 50.058 | | 99.534 | | *** | | 66 |
| **Month (Mo)** | 5 | 1.970 | 6.483 | *** | 5.942 | 0.316 | | 0.628 | | ns | | 0 |
| **Si×Mo** | 5 | 1.641 | 5.400 | *** | 9.536 | 0.696 | | 1.385 | | ns | | 2 |
| **Residual** | 91 | 0.304 |  |  | 18.169 | 0.502 | |  | |  | | 33 |

**Supplementary Table 2:** Results of the pairwise comparisons contrasting proteins, lipid, chlorophyll *a* and phaeopigments sedimentary contents between the two sites in each sampling month (A) and among sampling periods within each site (B). t = T value, P(MC) = probability level after Monte Carlo simulations. * = P < 0.05; ** = P < 0.01; *** = P < 0.001; ns = not significant.

| **A** | **Proteins** | | **Lipids** | | **Chlorophyll-*a*** | |
| --- | --- | --- | --- | --- | --- | --- |
| **Month** | **t** | **P(MC)** | **t** | **P(MC)** | **t** | **P(MC)** |
| Apr | 4.147 | ** | 4.230 | ** | 8.442 | *** |
| Jun | 0.354 | ns | 1.018 | ns | 4.191 | ** |
| Aug | 4.716 | *** | 4.098 | ** | 6.508 | *** |
| Jan - Feb | 9.874 | *** | 3.325 | ** | 14.313 | *** |
| May - Jun | 1.051 | ns | 0.157 | ns | 7.010 | *** |
| Jul - Aug | 5.497 | *** | 3.219 | ** | 5.246 | *** |

| **B** |  | **Proteins** | | **Lipids** | | **Chlorophyll-*a*** | |
| --- | --- | --- | --- | --- | --- | --- | --- |
| **Site** | **Months** | **t** | **P(MC)** | **t** | **P(MC)** | **t** | **P(MC)** |
| Oristano  (Sandy- Mud) | Apr *vs* Jun | 2.388 | * | 5.249 | *** | 1.954 | ns |
| Apr *vs* Aug | 3.548 | ** | 4.561 | *** | 1.333 | ns |
| Apr *vs* Jan | 5.258 | *** | 4.618 | *** | 5.624 | *** |
| Apr *vs* May | 6.229 | *** | 5.211 | *** | 3.122 | ** |
| Apr *vs* Jul | 3.499 | ** | 4.282 | ** | 1.831 | ns |
| Jun *vs* Aug | 2.536 | * | 1.239 | ns | 2.563 | * |
| Jun *vs* Jan | 3.046 | ** | 0.825 | ns | 2.159 | ns |
| Jun *vs* May | 4.281 | *** | 0.332 | ns | 4.251 | ** |
| Jun *vs* Jul | 1.646 | ns | 1.198 | ns | 2.604 | * |
| Aug *vs* Jan | 0.920 | ns | 0.264 | ns | 4.360 | *** |
| Aug *vs* May | 0.003 | ns | 1.078 | ns | 1.393 | ns |
| Aug *vs* Jul | 1.492 | ns | 0.169 | ns | 0.935 | ns |
| Jan *vs* May | 1.464 | ns | 0.649 | ns | 6.329 | *** |
| Jan *vs* Jul | 0.999 | ns | 0.390 | ns | 3.535 | ** |
| May *vs* Jul | 2.281 | * | 1.054 | ns | 0.020 | ns |
| Teulada (Sandy) | Apr *vs* Jun | 1.436 | ns | 1.719 | ns | 1.339 | ns |
| Apr *vs* Aug | 2.932 | * | 1.364 | ns | 2.235 | * |
| Apr *vs* Jan | 0.803 | ns | 2.869 | * | 0.599 | ns |
| Apr *vs* May | 1.321 | ns | 1.014 | ns | 1.058 | ns |
| Apr *vs* Jul | 0.951 | ns | 0.799 | ns | 0.344 | ns |
| Jun *vs* Aug | 1.669 | ns | 2.147 | * | 0.295 | ns |
| Jun *vs* Jan | 2.245 | * | 2.246 | * | 1.977 | ns |
| Jun *vs* May | 0.605 | ns | 0.484 | ns | 0.015 | ns |
| Jun *vs* Jul | 1.734 | ns | 1.940 | ns | 1.611 | ns |
| Aug *vs* Jan | 4.929 | *** | 0.263 | ns | 3.270 | ** |
| Aug *vs* May | 1.710 | ns | 1.377 | ns | 0.227 | ns |
| Aug *vs* Jul | 0.399 | ns | 0.169 | ns | 2.085 | ns |
| Jan *vs* May | 2.053 | ns | 1.404 | ns | 1.561 | ns |
| Jan *vs* Jul | 1.596 | ns | 0.319 | ns | 0.366 | ns |
| May *vs* Jul | 1.761 | ns | 1.331 | ns | 1.318 | ns |

**Supplementary Table 3**: Results of multivariate PERMANOVA testing for the effects of Site (Si) and Month (Mo) and their interactions on the biochemical composition of OM (proteins, carbohydrates, and lipids). DF = degree of freedom; MS = mean squares; Pseudo-F = F; P(MC) = probability level after Monte Carlo simulations. * = P < 0.05; ** = P < 0.01; *** = P<0.001; ns = not significant.

| **Source** | **DF** | **MS** | **Pseudo-F** | **P(MC)** | **% EV** |
| --- | --- | --- | --- | --- | --- |
| **Site (Si)** | 1 | 45.381 | 23.576 | *** | 24 |
| **Month (Mo)** | 5 | 6.679 | 3.470 | *** | 8 |
| **Si×Mo** | 5 | 6.908 | 3.588 | ** | 16 |
| **Residual** | 91 | 1.925 |  |  | 52 |

**Supplementary Table 4:** Results of the pairwise comparisons testing for differences in the biochemical composition of sediments between sites in each sampling period (A), and among months in each site (B). T = T value, P(MC) = probability level after Monte Carlo simulations. * = P < 0.05; ** = P < 0.01; *** = P<0.001; ns = not significant.

| **A** |  |  |
| --- | --- | --- |
| **Month** | **t** | **P(MC)** |
| Apr | 3.590 | ** |
| Jun | 0.387 | ns |
| Aug | 4.602 | *** |
| Jan - Feb | 6.229 | *** |
| May - Jun | 0.903 | ns |
| Jul - Aug | 4.213 | *** |

| **B** | **Oristano** | | **Teulada** | |
| --- | --- | --- | --- | --- |
| **Months** | **t** | **P(MC)** | **t** | **P(MC)** |
| Apr *vs* Jun | 3.576 | *** | 1.335 | ns |
| Apr *vs* Aug | 3.839 | *** | 2.068 | * |
| Apr *vs* Jan | 4.064 | *** | 2.793 | ** |
| Apr *vs* May | 4.561 | *** | 1.051 | ns |
| Apr *vs* Jul | 3.678 | *** | 0.816 | ns |
| Jun *vs* Aug | 1.886 | * | 1.694 | ns |
| Jun *vs* Jan | 1.558 | ns | 2.123 | * |
| Jun *vs* May | 2.210 | * | 0.580 | ns |
| Jun *vs* Jul | 1.171 | ns | 1.730 | ns |
| Aug *vs* Jan | 0.754 | ns | 3.685 | ** |
| Aug *vs* May | 0.484 | ns | 1.454 | ns |
| Aug *vs* Jul | 1.192 | ns | 0.342 | ns |
| Jan *vs* May | 1.132 | ns | 1.653 | ns |
| Jan *vs* Jul | 0.664 | ns | 1.409 | ns |
| May *vs* Jul | 1.725 | ns | 1.483 | ns |

**Supplementary Table 5:** Results of the pairwise comparisons testing for differences in the protein content between sampling period (Month) in sediments and feces collected in the site of Teulada. T = T value, P(MC) = probability level after Monte Carlo simulations. * = P < 0.05; ** = P < 0.01; *** = P<0.001; ns = not significant.

| **Months** | **t** | **P(MC)** |
| --- | --- | --- |
| Apr *vs* Jun | 1.714 | ns |
| Apr *vs* Aug | 2.835 | * |
| Apr *vs* Jan | 1.252 | ns |
| Apr *vs* May | 1.420 | ns |
| Apr *vs* Jul | 1.066 | ns |
| Jun *vs* Aug | 0.818 | ns |
| Jun *vs* Jan | 2.302 | * |
| Jun *vs* May | 0.434 | ns |
| Jun *vs* Jul | 1.501 | ns |
| Aug *vs* Jan | 3.719 | *** |
| Aug *vs* May | 0.133 | ns |
| Aug *vs* Jul | 2.732 | ** |
| Jan *vs* May | 1.863 | ns |
| Jan *vs* Jul | 1.787 | ns |
| May *vs* Jul | 1.417 | ns |

## Supplementary Figures


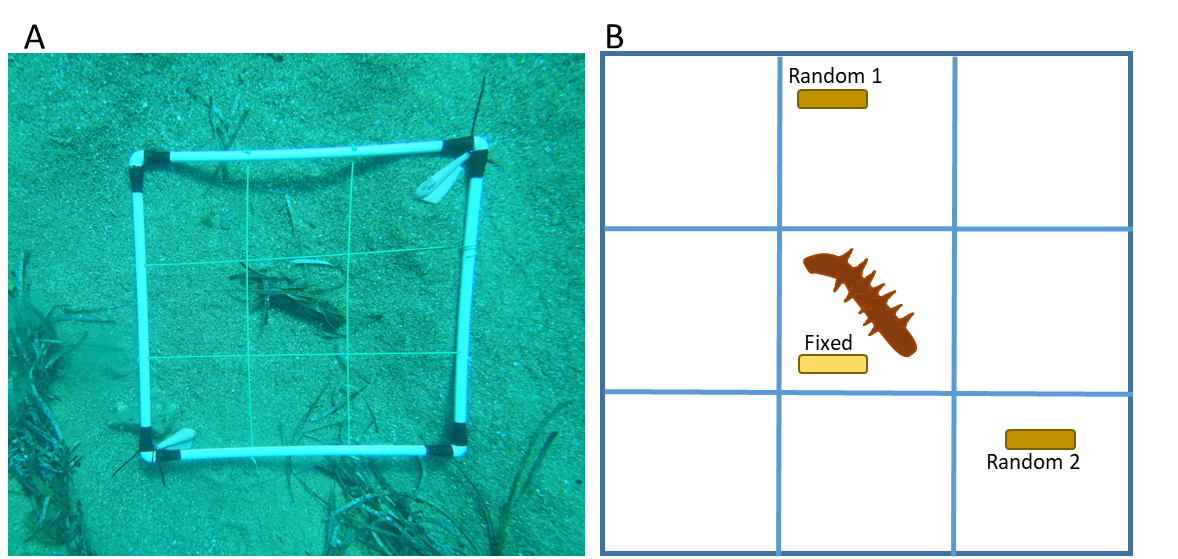


**Supplementary Figure 1**. Collection unit for sediments and sea cucumbers in the field (A). Schematic representation of the sampling design. Fixed indicates the sediment collected from the central sub-square, and Random 1 and Random 2 indicate the other two sediment samples randomly collected. Each Square frame was placed three times.


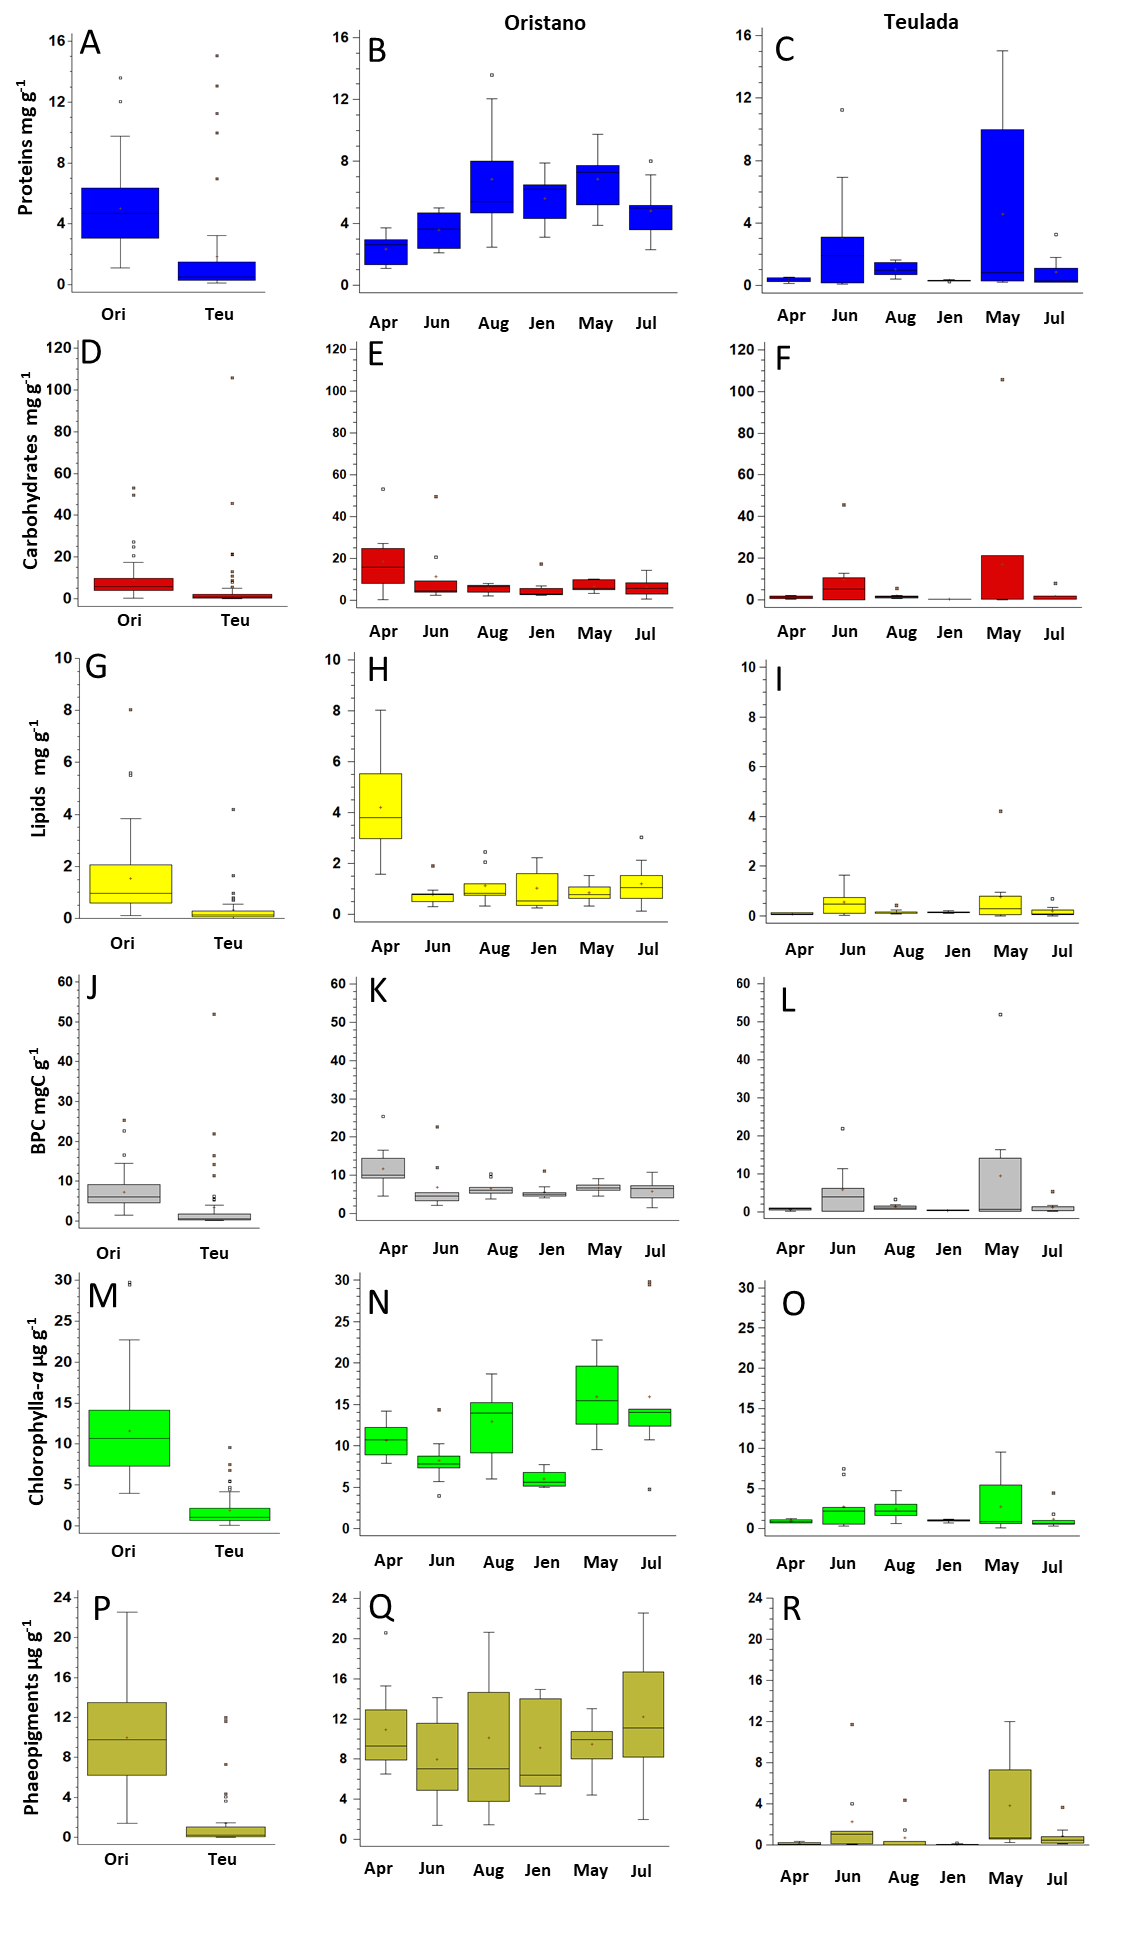


**Supplementary Figure 2.** Protein (A, B, C), carbohydrate (D, E, F), lipid (G, H, I), BPC (J, K, L), chlorophyll-*a* (M, N, O) and phaeopigments (P, Q, R) contents in the ambient sediment from Oristano and Teulada during the study period. The boxes show the interquartile range, with the median value indicated by the horizontal line and the ‘+’ sign indicating the mean; whiskers show the range. Individual symbols show outliers.

B

A


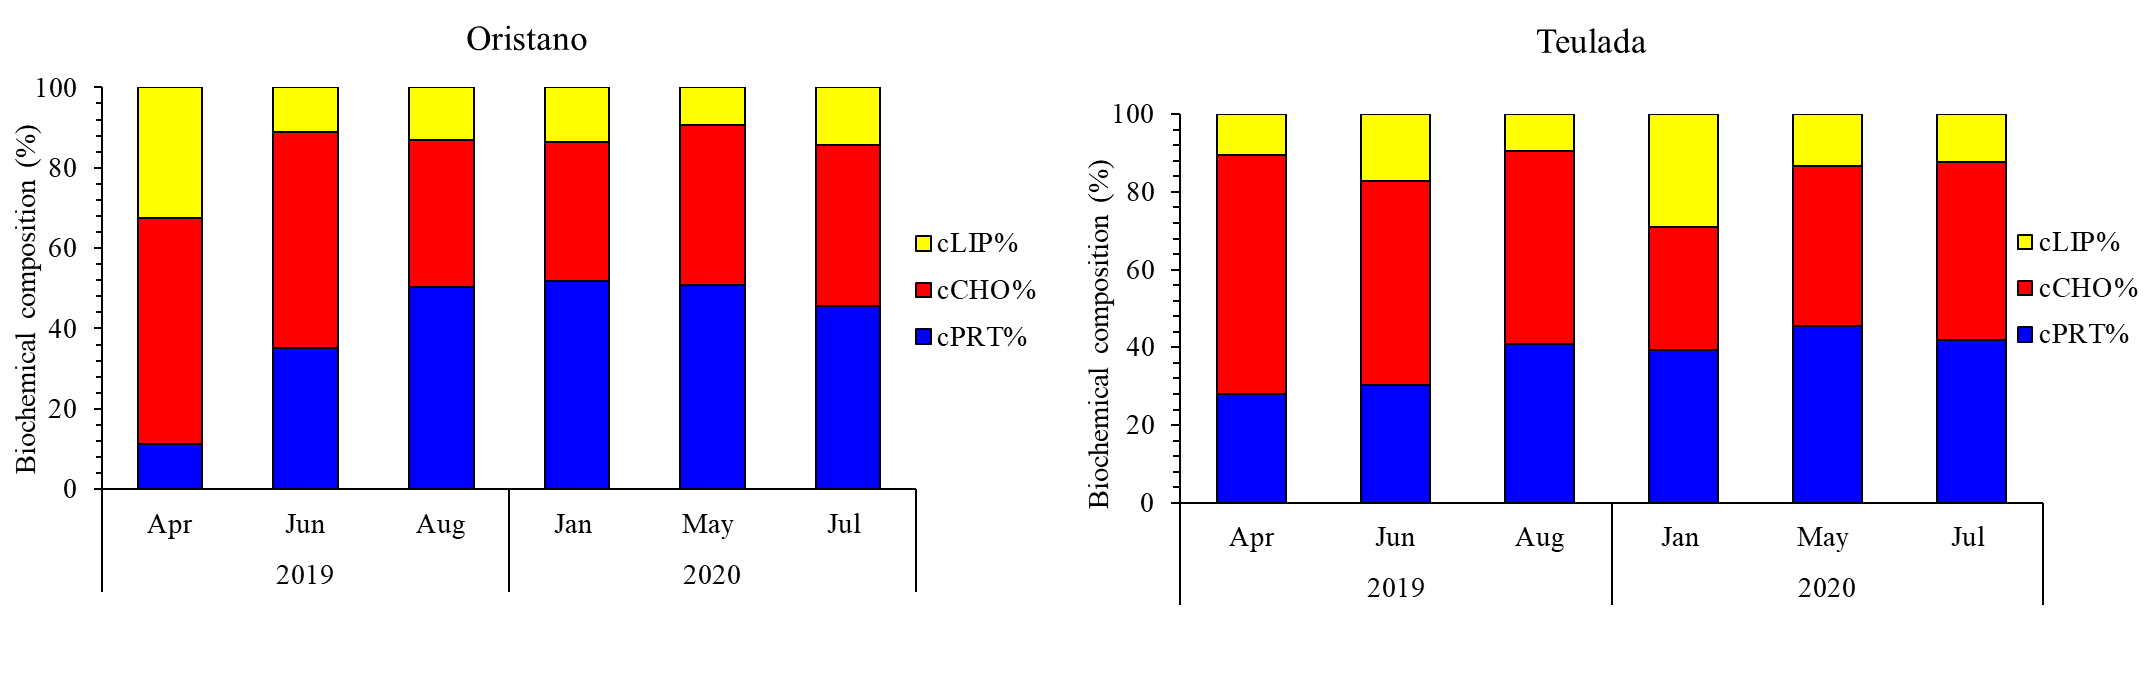


**Supplementary Figure 3.** Biochemical composition of sediments in Oristano (A) and Teulada (B) during the study period. Proteins, carbohydrates and lipids are expressed as percentage of their contribution to the biopolymeric C. cPRT = protein; cCHO = carbohydrate; cLIP = lipids
